# Supplementary material
Source: PubMed Central journal article supplement (PMC1266105)

1

2

3

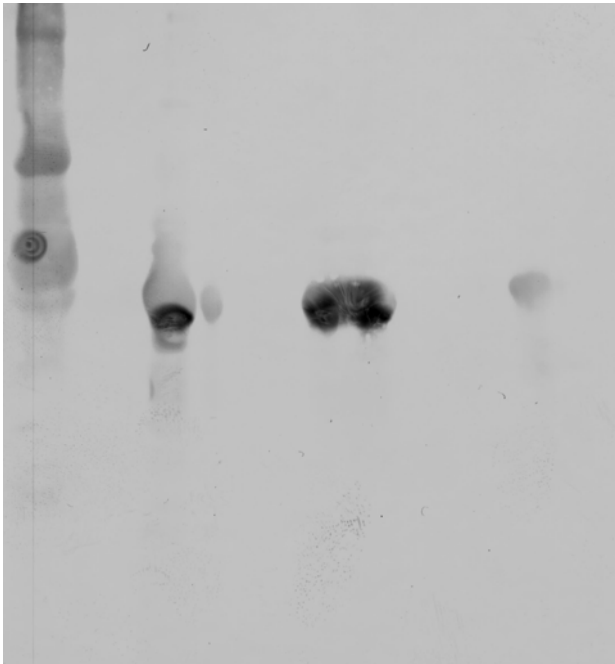

Supplement: pnas_0505545102_1.pdf [file pnas_0505545102_1.pdf]

1 2 3 4 5 6 7 8 9

137 kDa —

78 kDa —

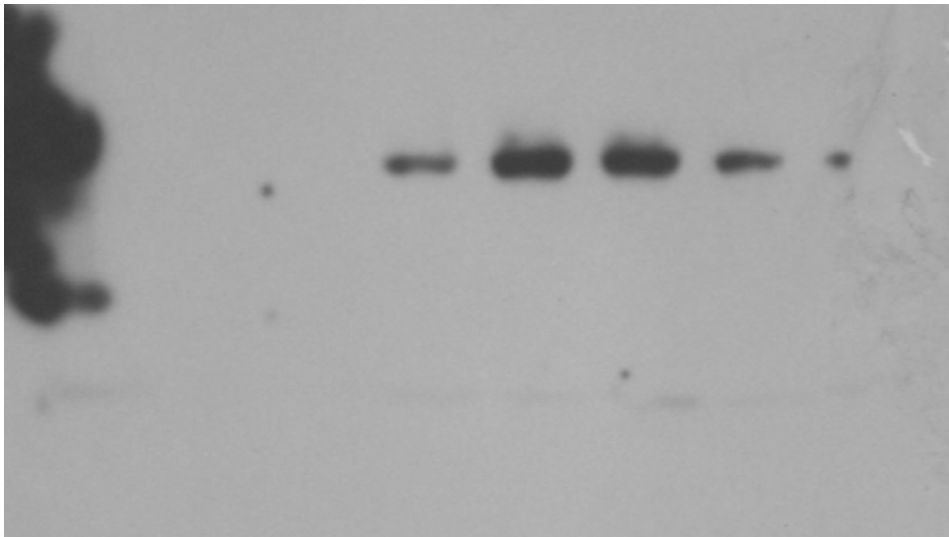

Supplement: pnas_0505545102_2.pdf [file pnas_0505545102_2.pdf]

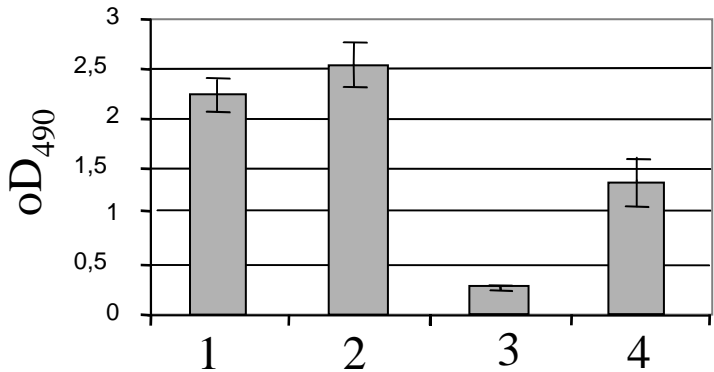

Supplement: pnas_0505545102_3.pdf [file pnas_0505545102_3.pdf]
